# Supplementary material
Source: publisher figshare collection journal article supplement (https://sage.figshare.com/ndownloader/files/14924201)
Supplement: Supplementary file 1 [file 14924201]

**Supplement Table S3.** Psoriasis Area and Severity Index score at week 12, 24, 36 and 48 during secukinumab treatment.

|         | Psoriasis Area and Severity Index score |                        |         |                    |
|---------|-----------------------------------------|------------------------|---------|--------------------|
|         | Without prior bio-failure               | With prior bio-failure |         | Total              |
|         | Mean/Median (IQR)                       | Mean/Median (IQR)      | P-value | Mean/Median (IQR)  |
| Week 0  | 15.8/ 14.4 (10.5)                       | 20.7 / 18.6 (12.8)     | 0.007** | 18.5 / 15.8 (12.4) |
| Week 4  | 5.4 / 4.5 (5.3)                         | 7.3 / 6.1 (8.0)        | 0.076   | 6.4 / 5.1 (6.9)    |
| week 12 | 2.8 / 2.5 (3.1)                         | 5.0 / 4.1 (5.4)        | 0.009** | 4.0 /2.7 (4.5)     |
| Week 24 | 2.8 / 2.2 (3.2)                         | 4.8/ 3.8 (4.6)         | 0.011*  | 3.9 / 2.5 (4.3)    |
| Week 36 | 2.6 /1.6 (3.0)                          | 5.7 /3.9 (5.5)         | 0.007** | 4.7 / 3.1 (5.3)    |
| Week 48 | 3.4 /2.7 (4.4)                          | 6.7 / 5.2 (5.9)        | 0.027*  | 5.6 / 4.3 (6.2)    |

IQR, interquartile range; \* p <0.05, \*\* p <0.01, \*\*\* p<0.001 for comparison between patients with and without prior biologic failure.
